# Supplementary material for: Curved block copolymer nanodiscs: structure transformations in cylindrical nanopores using the nonsolvent-assisted template wetting method
Source: Royal Society of Chemistry journal article supplement (doi:10.1039/c9sm01633c), 2019-01-01
Supplement: c9sm01633c1.pdf [file c9sm01633c1.pdf]

## Supporting Information

# Curved Block Copolymer Nanodiscs: Structure Transformations in Cylindrical Nanopores Using the Nonsolvent-Assisted Template Wetting Method

Yu-Liang Lin,<sup>1</sup> Ming-Hsiang Cheng,<sup>1</sup> Chun-Wei Chang,<sup>1</sup> Chien-Wei Chu,<sup>1</sup> Chih-Ting Liu,<sup>1</sup> and Jiun-Tai Chen<sup>1,2\*</sup>

<sup>1</sup>Department of Applied Chemistry, National Chiao Tung University, Hsinchu, Taiwan 30010

<sup>2</sup>Center for Emergent Functional Matter Science, National Chiao Tung University, Hsinchu, Taiwan 30010

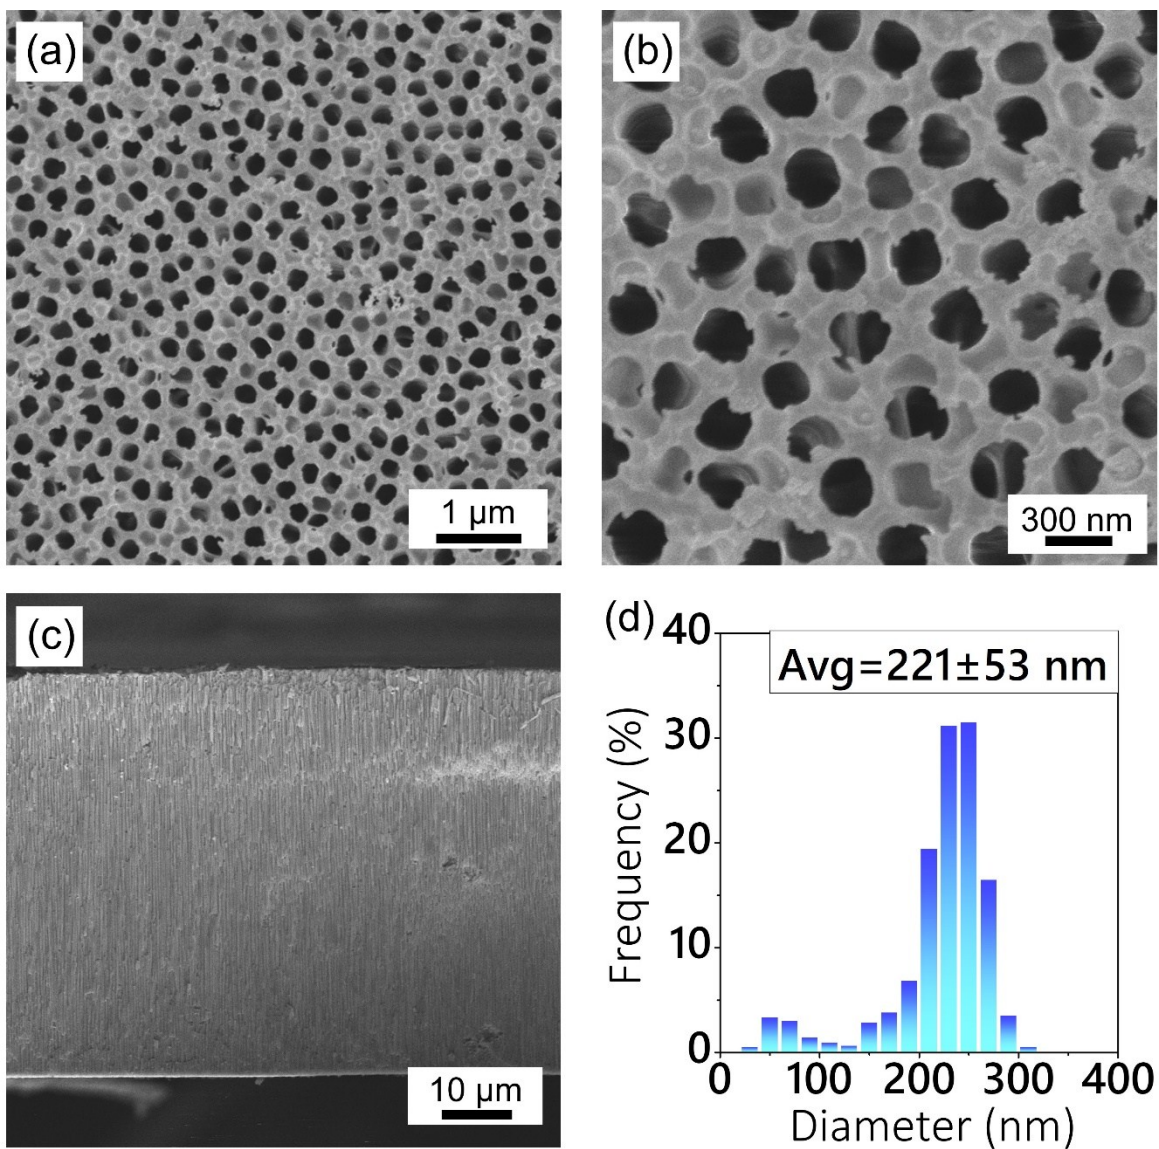

**Figure S1.** (a,b) SEM images with lower and higher magnifications of an AAO template. (c) Cross-sectional image of an AAO template. The thickness of the AAO template is  $\sim 57 \mu\text{m}$ . (d) Histogram of the pore sizes of the AAO template shown in (a). The average pore size of the AAO template is  $\sim 221 \text{ nm}$ .

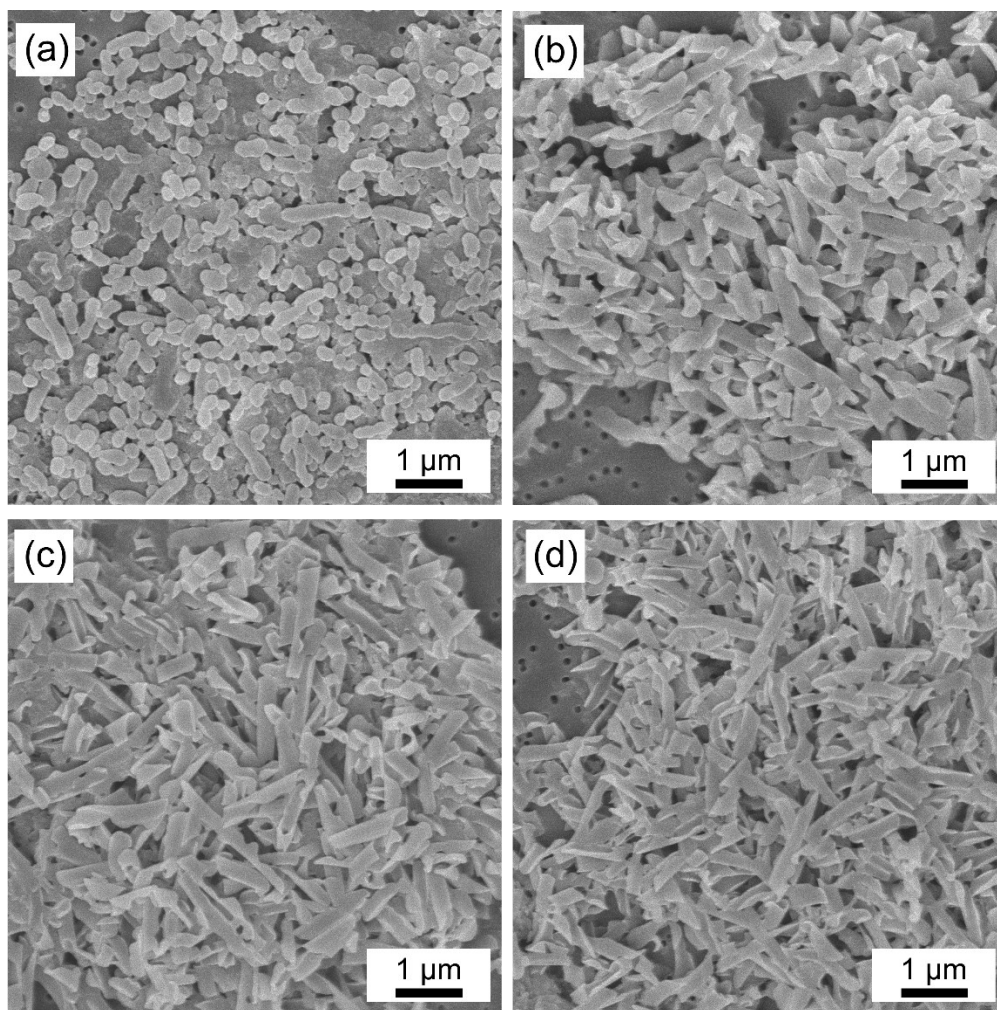

**Figure S2.** SEM images of PS-b-PDMS curved nanodiscs annealed at 130 °C for (a) 5, (b) 10, (c) 15, and (d) 30 min.

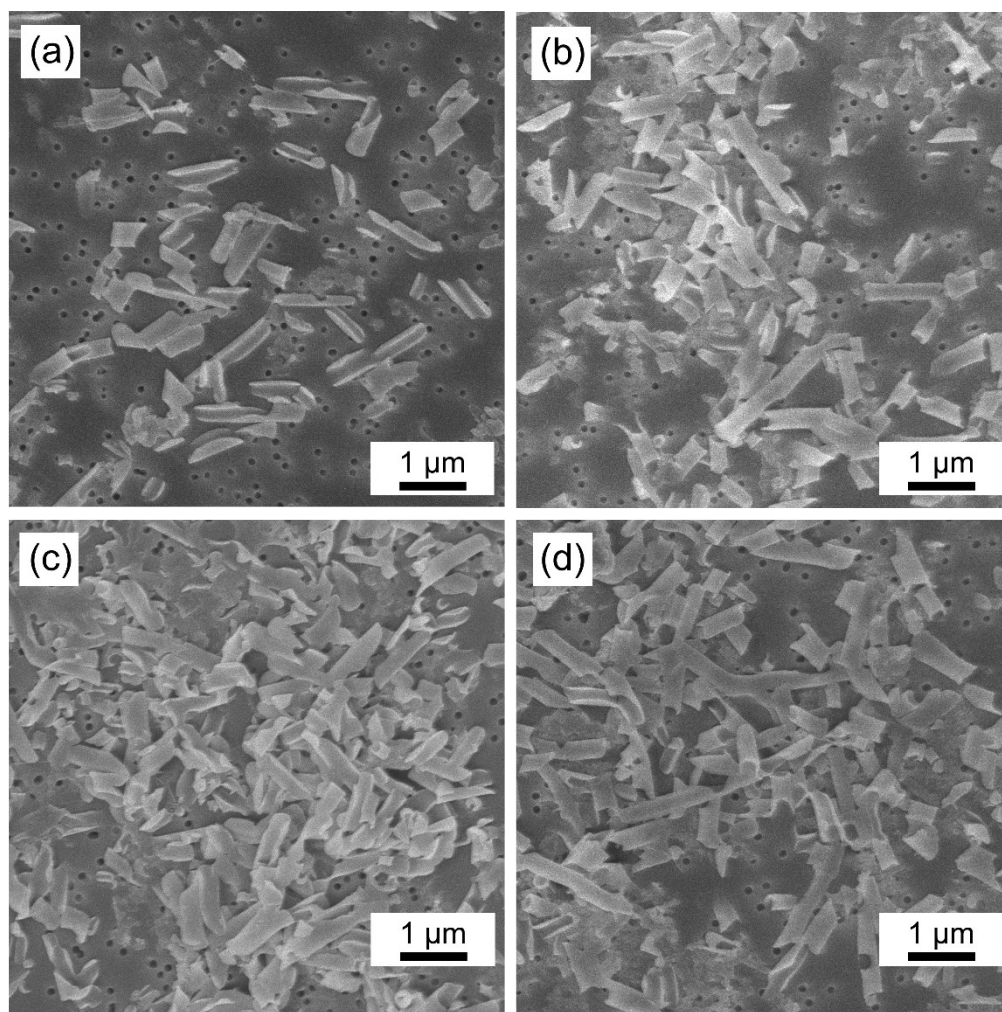

**Figure S3.** SEM images of PS-b-PDMS curved nanodiscs annealed at (a) 150, (b) 170, (c) 190, and (d) 210 °C for 10 min.
